# Supplementary material for: One Health, One Hive: A scoping review of honey bees, climate change, pollutants, and antimicrobial resistance
Source: PubMed Central journal article supplement (PMC8849492; doi:10.1371/journal.pone.0242393), 2022-02-16
Supplement: pone.0242393.s002.pdf [file pone.0242393.s002.pdf]

**S3 Table. Complete search strings used in the searched databases.**

Web of Science™ all databases<sup>1</sup>

|   |                                                                                                                                                                                                                                                                                                                                                                                                                                                                                                                                                                                                                                                                                                                                                                                                                                                                                                                                                                                                                                                                                                                                                                                                                                                                                                                                                                                                                                                                                                                                                                                                                                                                                                                                                                                                           |
|---|-----------------------------------------------------------------------------------------------------------------------------------------------------------------------------------------------------------------------------------------------------------------------------------------------------------------------------------------------------------------------------------------------------------------------------------------------------------------------------------------------------------------------------------------------------------------------------------------------------------------------------------------------------------------------------------------------------------------------------------------------------------------------------------------------------------------------------------------------------------------------------------------------------------------------------------------------------------------------------------------------------------------------------------------------------------------------------------------------------------------------------------------------------------------------------------------------------------------------------------------------------------------------------------------------------------------------------------------------------------------------------------------------------------------------------------------------------------------------------------------------------------------------------------------------------------------------------------------------------------------------------------------------------------------------------------------------------------------------------------------------------------------------------------------------------------|
| 1 | TOPIC: (bee OR bees OR honey\$bee* OR honeybee* OR honey OR beekeep* OR apiar* OR apicultur* OR “apis mellifera” OR apidae OR (hive AND (health OR success OR collapse OR product* OR stability)))                                                                                                                                                                                                                                                                                                                                                                                                                                                                                                                                                                                                                                                                                                                                                                                                                                                                                                                                                                                                                                                                                                                                                                                                                                                                                                                                                                                                                                                                                                                                                                                                        |
| 2 | TOPIC: (((resistan* OR stewardship) AND (antibiotic* OR antimicrobial* OR anti-microbial* OR anti-bacterial* OR antibacterial* OR anti\$viral* OR antiviral* OR anti\$fungal* OR antifungal* OR anti\$helminthic* OR antihelminthic* OR anthelmintic* OR anti\$parasitic* OR antiparasitic* OR parasiticide* OR biocid* OR antiseptic* OR disinfectant* OR sterilant* OR sterili\$er* OR chemosterilant* OR multidrug OR “multi\$dru\$g”)) OR AMR OR XDR OR TDR OR “super\$bug*” OR superbug*)                                                                                                                                                                                                                                                                                                                                                                                                                                                                                                                                                                                                                                                                                                                                                                                                                                                                                                                                                                                                                                                                                                                                                                                                                                                                                                            |
| 3 | TOPIC: ((climat* NEAR (chang* OR model\$ing OR predict* OR resilience OR sensitivity)) OR (environment* NEAR chang*)) OR “climate variability” OR “climatic variability” OR “global warm*” OR “greenhouse effect” OR “climate disaster” OR (storm NOT (electrical OR autonomic OR thyroid*)) OR wind OR “atmospheric pressure” OR season* OR precipitation OR snow* OR ice OR humid* OR rain* OR flood OR drought OR wildfire* OR (heat NEAR (wave* OR extreme* OR event)) OR temperature* OR cool OR cold OR weather OR “ultraviolet radiation” OR UV OR “El Nino-Southern Oscillation” OR “El Nino” OR “La Nina”)                                                                                                                                                                                                                                                                                                                                                                                                                                                                                                                                                                                                                                                                                                                                                                                                                                                                                                                                                                                                                                                                                                                                                                                       |
| 4 | TOPIC: (“air pollut*” OR “persistent organic pollut*” OR “particulate matter” OR “atmospheric contamin*” OR “atmospheric pollut*” OR “volatile organic compound*” OR “volatile organic pollutant” OR VOC OR VOCS OR “ambient air pollution” OR “household air pollution” OR “criteria air pollutant*” OR “biological air pollutant*” OR “physical pollutant*” OR “chemical pollutant*” OR gases OR (“fossil fuel” OR industr* AND pollut*) OR ((air OR water* OR soil) AND (contamin* OR toxic* OR “environment* health” OR quality OR disease* OR particulate* OR metal OR metals OR lead OR lead\$II* OR Pb OR pb\$+ OR zinc* OR Zn OR Zn\$+ OR silver* OR Ag OR Ag+ OR copper* OR Cu OR Cu\$+ OR Gallium* OR Ga OR Ga\$+ OR cobalt* OR Co OR Co\$+ OR Mercury* OR Hg OR Hg\$+ OR Arsenic* OR As OR As\$+ OR Nickel* OR Ni OR Ni\$+ OR vehicle* OR automobile* OR exhaust OR motorway* OR roadway* OR highway* OR freeway* OR road* OR traffic OR urban OR Nox OR “nitrogen oxides” OR ozone OR particle*)) OR dust OR dusts OR “PM 2\$5” OR PM2\$5 OR PM\$10 OR “ultrafine particle*” OR “polycyclic aromatic hydrocarbon*” OR PAH OR POPS OR smog OR “water pollut*” OR (water* AND (potable OR healthy OR drink* OR safe OR suitab* OR palatable OR edible OR tap OR fresh OR supply OR “microbial contamina*”)) OR waterborne OR water\$borne OR aquifer OR groundwater OR pesticid* OR herbicid* OR insecticid* OR acaricid* OR fungicid* OR molluscacid* OR larvicid* OR fumigant OR “anti\$fouling agent*” OR “agricultural chemical*” OR agrochemical* OR (defoliant* AND (chemical* OR agent*)) OR (hazardous AND substance*) OR (toxic AND action*) OR “chemically\$induced disorder*” OR furfural OR aculeximycin OR “aluminum phosphide” OR “chromated copper arsenate” OR CCA OR creosote) |
| 5 | #3 OR #4                                                                                                                                                                                                                                                                                                                                                                                                                                                                                                                                                                                                                                                                                                                                                                                                                                                                                                                                                                                                                                                                                                                                                                                                                                                                                                                                                                                                                                                                                                                                                                                                                                                                                                                                                                                                  |
| 6 | #1 AND #2 AND #5                                                                                                                                                                                                                                                                                                                                                                                                                                                                                                                                                                                                                                                                                                                                                                                                                                                                                                                                                                                                                                                                                                                                                                                                                                                                                                                                                                                                                                                                                                                                                                                                                                                                                                                                                                                          |

<sup>1</sup> The Web of Science database index manager includes the following databases: Web of Science Core Collection, BIOSIS Citation Index, BIOSIS Previews, CABI: CAB Abstracts®, Current Contents Connect, Data Citation Index, Derwent Innovations Index, FSTA® - the food science resource, KCI-Korean Journal Database, MEDLINE®, Russian Science Citation Index, SciELO Citation Index, and Zoological Record.

Scopus®

|   |                                                                                                                                                                                                                                                                                                                                                                                                                                                                                                                                                                                                                                                                                                                                                                                                                                                                                                                                                                                                                                                                                                                                                                                                                                                                                                                                                                                                                                                                                                                                                                                                                                                                                             |
|---|---------------------------------------------------------------------------------------------------------------------------------------------------------------------------------------------------------------------------------------------------------------------------------------------------------------------------------------------------------------------------------------------------------------------------------------------------------------------------------------------------------------------------------------------------------------------------------------------------------------------------------------------------------------------------------------------------------------------------------------------------------------------------------------------------------------------------------------------------------------------------------------------------------------------------------------------------------------------------------------------------------------------------------------------------------------------------------------------------------------------------------------------------------------------------------------------------------------------------------------------------------------------------------------------------------------------------------------------------------------------------------------------------------------------------------------------------------------------------------------------------------------------------------------------------------------------------------------------------------------------------------------------------------------------------------------------|
| 1 | TITLE-ABS-KEY(bee OR bees OR honey?bee* OR honeybee* OR honey OR beekeep* OR apiar* OR apicultur* OR “apis mellifera” OR apidae OR (hive AND (health OR success OR collapse OR product* OR stability)))                                                                                                                                                                                                                                                                                                                                                                                                                                                                                                                                                                                                                                                                                                                                                                                                                                                                                                                                                                                                                                                                                                                                                                                                                                                                                                                                                                                                                                                                                     |
| 2 | TITLE-ABS-KEY(((resistan* OR stewardship) AND (antibiotic* OR antimicrobial* OR anti-microbial* OR anti-bacterial* OR antibacterial* OR anti?viral* OR antiviral* OR anti?fungal* OR antifungal* OR anti?helminthic* OR antihelminthic* OR anthelmintic* OR anti?parasitic* OR antiparasitic* OR parasiticide* OR biocid* OR antiseptic* OR disinfectant* OR sterilant* OR sterili?er* OR chemosterilant* OR multidrug OR “multi?drug”)) OR AMR OR XDR OR TDR OR “super?bug*” OR superbug*)                                                                                                                                                                                                                                                                                                                                                                                                                                                                                                                                                                                                                                                                                                                                                                                                                                                                                                                                                                                                                                                                                                                                                                                                 |
| 3 | TITLE-ABS-KEY(((climat* w/15 (chang* OR model?ing OR predict* OR resilience OR sensitivity)) OR (environment* w/15 chang*) OR “climate variability” OR “climatic variability” OR “global warm*” OR “greenhouse effect” OR “climate disaster” OR (storm AND NOT (electrical OR autonomic OR thyroid*)) OR wind OR “atmospheric pressure” OR season* OR precipitation OR snow* OR ice OR humid* OR rain* OR flood OR drought OR wildfire* OR (heat w/15 (wave* OR extreme* OR event)) OR temperature* OR cool OR cold OR weather OR “ultraviolet radiation” OR UV OR “El Nino-Southern Oscillation” OR “El Nino” OR “La Nina”))                                                                                                                                                                                                                                                                                                                                                                                                                                                                                                                                                                                                                                                                                                                                                                                                                                                                                                                                                                                                                                                               |
| 4 | TITLE-ABS-KEY(“air pollut*” OR “persistent organic pollut*” OR “particulate matter” OR “atmospheric contamin*” OR “atmospheric pollut*” OR “volatile organic compound*” OR “volatile organic pollutant” OR VOC OR VOCS OR “ambient air pollution” OR “household air pollution” OR “criteria air pollutant*” OR “biological air pollutant*” OR “physical pollutant*” OR “chemical pollutant*” OR gases OR (“fossil fuel” OR industr*) AND pollut*) OR ((air OR water* OR soil) AND (contamin* OR toxic* OR “environment* health” OR quality OR disease* OR particulate* OR metal OR metals OR lead OR lead?II* OR Pb OR pb?+ OR zinc* OR Zn OR Zn?+ OR silver* OR Ag OR Ag+ OR copper* OR Cu OR Cu?+ OR Gallium* OR Ga OR Ga?+ OR cobalt* OR Co OR Co?+ OR Mercury* OR Hg OR Hg?+ OR Arsenic* OR As OR As?+ OR Nickel* OR Ni OR Ni?+ OR vehicle* OR automobile* OR exhaust OR motorway* OR roadway* OR highway* OR freeway* OR road* OR traffic OR urban OR Nox OR “nitrogen oxides” OR ozone OR particle*)) OR dust OR dusts OR PM?2?5 OR PM?10 OR “ultrafine particle*” OR “polycyclic aromatic hydrocarbon*” OR PAH OR POPS OR smog OR “water pollut*” OR (water* AND (potable OR healthy OR drink* OR safe OR suitab* OR palatable OR edible OR tap OR fresh OR supply OR “microbial contamina*”)) OR waterborne OR water?borne OR aquifer OR groundwater OR pesticid* OR herbicid* OR insecticid* OR acaricid* OR fungicid* OR molluscacid* OR larvicid* OR fumigant OR “anti?fouling agent*” OR “agricultural chemical*” OR agrochemical* OR (defoliant* AND (chemical* OR agent*)) OR (hazardous AND substance*) OR (toxic AND action*) OR “chemically?induced disorder*” OR furfural |

|   |                                                                                                   |
|---|---------------------------------------------------------------------------------------------------|
|   | <b>OR aculeximycin OR “aluminum phosphide” OR “chromated copper arsenate” OR CCA OR creosote)</b> |
| 5 | <b>#3 OR #4</b>                                                                                   |
| 6 | <b>#1 AND #2 AND #5</b>                                                                           |

Embase® via Ovid®

|   |                                                                                                                                                                                                                                                                                                                                                                                                                                                                                                                                                                                                                                                                                                                                                                                                                                                                                                                                                                                                                                                                                                                                                                                                                                                                                                     |
|---|-----------------------------------------------------------------------------------------------------------------------------------------------------------------------------------------------------------------------------------------------------------------------------------------------------------------------------------------------------------------------------------------------------------------------------------------------------------------------------------------------------------------------------------------------------------------------------------------------------------------------------------------------------------------------------------------------------------------------------------------------------------------------------------------------------------------------------------------------------------------------------------------------------------------------------------------------------------------------------------------------------------------------------------------------------------------------------------------------------------------------------------------------------------------------------------------------------------------------------------------------------------------------------------------------------|
| 1 | <b>(bee OR bees OR honey?bee* OR honeybee* OR honey OR beekeep* OR apiar* OR apicultur* OR apis mellifera OR apidae OR (hive AND (health OR success OR collapse OR product* OR stability))).mp. [mp=title, abstract, heading word, drug trade name, original title, device manufacturer, drug manufacturer, device trade name, keyword, floating subheading word, candidate term word]</b>                                                                                                                                                                                                                                                                                                                                                                                                                                                                                                                                                                                                                                                                                                                                                                                                                                                                                                          |
| 2 | <b>((resistan* OR stewardship) AND (antibiotic* OR antimicrobial* OR anti-microbial* OR anti-bacterial* OR antibacterial* OR anti?viral* OR antiviral* OR anti?fungal* OR antifungal* OR anti?helminthic* OR antihelminthic* OR anthelmintic* OR anti?parasitic* OR antiparasitic* OR parasiticide* OR biocid* OR antiseptic* OR disinfectant* OR sterilant* OR sterili?er* OR chemosterilant* OR multidrug OR multi?drug)) OR AMR OR XDR OR TDR OR super?bug* OR superbug*).mp. [mp=title, abstract, heading word, drug trade name, original title, device manufacturer, drug manufacturer, device trade name, keyword, floating subheading word, candidate term word]</b>                                                                                                                                                                                                                                                                                                                                                                                                                                                                                                                                                                                                                         |
| 3 | <b>((climat* adj15 (chang* OR model?ing OR predict* OR resilience OR sensitivity)) OR (environment* adj15 chang*) OR climate variability OR climatic variability OR global warm* OR greenhouse effect OR climate disaster OR (storm NOT (electrical OR autonomic OR thyroid*)) OR wind OR atmospheric pressure OR season* OR precipitation OR snow* OR ice OR humid* OR rain* OR flood OR drought OR wildfire* OR (heat adj15 (wave* OR extreme* OR event)) OR temperature* OR cool OR cold OR weather OR ultraviolet radiation OR UV OR El Nino-Southern Oscillation OR El Nino OR La Nina).mp. [mp=title, abstract, heading word, drug trade name, original title, device manufacturer, drug manufacturer, device trade name, keyword, floating subheading word, candidate term word]</b>                                                                                                                                                                                                                                                                                                                                                                                                                                                                                                         |
| 4 | <b>(air pollut* OR persistent organic pollut* OR particulate matter OR atmospheric contamin* OR atmospheric pollut* OR volatile organic compound* OR volatile organic pollutant OR VOC OR VOCS OR ambient air pollution OR household air pollution OR criteria air pollutant* OR biological air pollutant* OR physical pollutant* OR chemical pollutant* OR gases OR ((fossil fuel OR industr*) AND pollut*) OR ((air OR water* OR soil) AND (contamin* OR toxic* OR environment* health OR quality OR disease* OR particulate* OR metal OR metals OR lead OR lead?II* OR Pb OR pb?+ OR zinc* OR Zn OR Zn?+ OR silver* OR Ag OR Ag+ OR copper* OR Cu OR Cu?+ OR Gallium* OR Ga OR Ga?+ OR cobalt* OR Co OR Co?+ OR Mercury* OR Hg OR Hg?+ OR Arsenic* OR As OR As?+ OR Nickel* OR Ni OR Ni?+ OR vehicle* OR automobile* OR exhaust OR motorway* OR roadway* OR highway* OR freeway* OR road* OR traffic OR urban OR Nox OR nitrogen oxides OR ozone OR particle*)) OR dust OR dusts OR PM?2?5 OR PM?10 OR ultrafine particle* OR polycyclic aromatic hydrocarbon* OR PAH OR POPS OR smog OR water pollut* OR (water* AND (potable OR healthy OR drink* OR safe OR suitab* OR palatable OR edible OR tap OR fresh OR supply OR microbial contamina*)) OR waterborne OR water?borne OR aquifer OR</b> |

|   |                                                                                                                                                                                                                                                                                                                                                                                                                                                                                                                                                                                                                        |
|---|------------------------------------------------------------------------------------------------------------------------------------------------------------------------------------------------------------------------------------------------------------------------------------------------------------------------------------------------------------------------------------------------------------------------------------------------------------------------------------------------------------------------------------------------------------------------------------------------------------------------|
|   | groundwater OR pesticid* OR herbicid* OR insecticid* OR acaricid* OR fungicid* OR molluscacid* OR larvicid* OR fumigant OR anti?fouling agent* OR agricultural chemical* OR agrochemical* OR (defoliant* AND (chemical* OR agent*)) OR (hazardous AND substance*) OR (toxic AND action*) OR chemically?induced disorder* OR furfural OR aculeximycin OR aluminum phosphide OR chromated copper arsenate OR CCA OR creosote).mp. [mp=title, abstract, heading word, drug trade name, original title, device manufacturer, drug manufacturer, device trade name, keyword, floating subheading word, candidate term word] |
| 5 | 3 OR 4                                                                                                                                                                                                                                                                                                                                                                                                                                                                                                                                                                                                                 |
| 6 | 1 AND 2 AND 5                                                                                                                                                                                                                                                                                                                                                                                                                                                                                                                                                                                                          |

AGRICOLA™ via ProQuest®

|   |                                                                                                                                                                                                                                                                                                                                                                                                                                                                                                                                                                                                                                                                                                                                                                                                                                                                                                                                                                                                                                                                                                                                                                                                                                                                                                                                                        |
|---|--------------------------------------------------------------------------------------------------------------------------------------------------------------------------------------------------------------------------------------------------------------------------------------------------------------------------------------------------------------------------------------------------------------------------------------------------------------------------------------------------------------------------------------------------------------------------------------------------------------------------------------------------------------------------------------------------------------------------------------------------------------------------------------------------------------------------------------------------------------------------------------------------------------------------------------------------------------------------------------------------------------------------------------------------------------------------------------------------------------------------------------------------------------------------------------------------------------------------------------------------------------------------------------------------------------------------------------------------------|
| 1 | noft(bee OR bees OR honey*bee* OR honeybee* OR honey OR beekeep* OR apiar* OR apicultur* OR “apis mellifera” OR apidae OR (hive AND (health OR success OR collapse OR product* OR stability)))                                                                                                                                                                                                                                                                                                                                                                                                                                                                                                                                                                                                                                                                                                                                                                                                                                                                                                                                                                                                                                                                                                                                                         |
| 2 | noft(((resistan* OR stewardship) AND (antibiotic* OR antimicrobial* OR anti-microbial* OR anti-bacterial* OR antibacterial* OR anti*viral* OR antiviral* OR anti*fungal* OR antifungal* OR anti*helminthic* OR antihelminthic* OR anthelmintic* OR anti*parasitic* OR antiparasitic* OR parasiticide* OR biocid* OR antiseptic* OR disinfectant* OR sterilant* OR sterili*er* OR chemosterilant* OR multidrug OR “multi*drug”)) OR AMR OR XDR OR TDR OR “super*bug*” OR superbug*)                                                                                                                                                                                                                                                                                                                                                                                                                                                                                                                                                                                                                                                                                                                                                                                                                                                                     |
| 3 | noft((climat* NEAR/15 (chang* OR model*ing OR predict* OR resilience OR sensitivity)) OR (environment* NEAR/15 chang*) OR “climate variability” OR “climatic variability” OR “global warm*” OR “greenhouse effect” OR “climate disaster” OR (storm NOT (electrical OR autonomic OR thyroid*)) OR wind OR “atmospheric pressure” OR season* OR precipitation OR snow* OR ice OR humid* OR rain* OR flood OR drought OR wildfire* OR (heat NEAR/15 (wave* OR extreme* OR event)) OR temperature* OR cool OR cold OR weather OR “ultraviolet radiation” OR UV OR “El Nino-Southern Oscillation” OR “El Nino” OR “La Nina”)                                                                                                                                                                                                                                                                                                                                                                                                                                                                                                                                                                                                                                                                                                                                |
| 4 | noft(“air pollut*” OR “persistent organic pollut*” OR “particulate matter” OR “atmospheric contamin*” OR “atmospheric pollut*” OR “volatile organic compound*” OR “volatile organic pollutant” OR VOC OR VOCS OR “ambient air pollution” OR “household air pollution” OR “criteria air pollutant*” OR “biological air pollutant*” OR “physical pollutant*” OR “chemical pollutant*” OR gases OR (“fossil fuel” OR industr*) AND pollut*) OR ((air OR water* OR soil) AND (contamin* OR toxic* OR “environment* health” OR quality OR disease* OR particulate* OR metal OR metals OR lead OR lead*II* OR Pb OR pb*+ OR zinc* OR Zn OR Zn*+ OR silver* OR Ag OR Ag+ OR copper* OR Cu OR Cu*+ OR Gallium* OR Ga OR Ga*+ OR cobalt* OR Co OR Co*+ OR Mercury* OR Hg OR Hg*+ OR Arsenic* OR As OR As*+ OR Nickel* OR Ni OR Ni*+ OR vehicle* OR automobile* OR exhaust OR motorway* OR roadway* OR highway* OR freeway* OR road* OR traffic OR urban OR Nox OR “nitrogen oxides” OR ozone OR particle*)) OR dust OR dusts OR PM*2*5 OR PM*10 OR “ultrafine particle*” OR “polycyclic aromatic hydrocarbon*” OR PAH OR POPS OR smog OR “water pollut*” OR (water* AND (potable OR healthy OR drink* OR safe OR suitab* OR palatable OR edible OR tap OR fresh OR supply OR “microbial contamina*”)) OR waterborne OR water*borne OR aquifer OR groundwater OR |

|   |                                                                                                                                                                                                                                                                                                                                                                                                                                                                                                                                                                                                |
|---|------------------------------------------------------------------------------------------------------------------------------------------------------------------------------------------------------------------------------------------------------------------------------------------------------------------------------------------------------------------------------------------------------------------------------------------------------------------------------------------------------------------------------------------------------------------------------------------------|
|   | pesticid* <b>OR</b> herbicid* <b>OR</b> insecticid* <b>OR</b> acaricid* <b>OR</b> fungicid* <b>OR</b> molluscacid* <b>OR</b> larvicid* <b>OR</b> fumigant <b>OR</b> “anti*fouling agent*” <b>OR</b> “agricultural chemical*” <b>OR</b> agrochemical* <b>OR</b> (defoliant* <b>AND</b> (chemical* <b>OR</b> agent*)) <b>OR</b> (hazardous <b>AND</b> substance*) <b>OR</b> (toxic <b>AND</b> action*) <b>OR</b> “chemically*induced disorder*” <b>OR</b> furfural <b>OR</b> aculeximycin <b>OR</b> “aluminum phosphide” <b>OR</b> “chromated copper arsenate” <b>OR</b> CCA <b>OR</b> creosote) |
| 5 | 3 <b>OR</b> 4                                                                                                                                                                                                                                                                                                                                                                                                                                                                                                                                                                                  |
| 6 | 1 <b>AND</b> 2 <b>AND</b> 5                                                                                                                                                                                                                                                                                                                                                                                                                                                                                                                                                                    |
